# Supplementary material for: Endotoxemia shifts neutrophils with TIMP-free gelatinase B/MMP-9 from bone marrow to the periphery and induces systematic upregulation of TIMP-1
Source: PubMed Central journal article supplement — Haematologica. 2017 Aug 3;102(10):1671–82. doi: 10.3324/haematol.2017.168799 (PMC5622851; doi:10.3324/haematol.2017.168799), 2017-10
Supplement: 2017.168799.VANDOOREN_SUPPL.pdf [file 2017.168799.VANDOOREN_SUPPL.pdf]

## **Endotoxemia shifts neutrophils with TIMP-free gelatinase B/MMP-9 from bone marrow to the periphery and induces systematic upregulation of TIMP-1**

Jennifer Vandooren, Wannes Swinnen, Estefania Ugarte-Berzal, Lise Boon, Daphne Dorst, Erik Martens and Ghislain Opendakker

Laboratory of Immunobiology, Department of Microbiology and Immunology, Rega Institute for Medical Research, University of Leuven, KU Leuven, Belgium.

©2017 Ferrata Storti Foundation. This is an open-access paper. doi:10.3324/haematol.2017.168799

Received: March 15, 2017.

Accepted: July 27, 2017.

Pre-published: August 3, 2017.

Correspondence: [ghislain.opdenakker@kuleuven.be](mailto:ghislain.opdenakker@kuleuven.be)

---

**Supplementary table 1:** The effect of endotoxin shock on MMPs and TIMPs.

| MMP/ Other Model |                                  | Method/ trigger                                                   | Result                                                     | Detection method  | Ref.       |
|------------------|----------------------------------|-------------------------------------------------------------------|------------------------------------------------------------|-------------------|------------|
| <b>BLOOD</b>     |                                  |                                                                   |                                                            |                   |            |
| <b>MMP-2</b>     | Mice                             | CLP                                                               | protein levels =                                           | WB                | (1)        |
|                  | Rats                             | LPS                                                               | protein levels ↓ (6-12h post LPS)                          | WB, zymography    | (2)        |
|                  | Pigs                             | live <i>E. Coli</i> LE392                                         | protein levels =                                           | zymography        | (3)        |
|                  | Human                            | patient samples                                                   | protein levels =                                           | ELISA, zymography | (4, 5)     |
| <b>MMP-8</b>     | Human                            | patient samples                                                   | protein levels ↑                                           | ELISA             | (6)        |
| <b>MMP-9</b>     | Human cell culture (neutrophils) | LPS <i>E. Coli</i> B6:026/ O111:B4 / PepG <i>St aureus</i>        | protein levels ↑                                           | ELISA, zymography | WB, (7, 8) |
|                  | Mice                             | CLP                                                               | protein levels ↑                                           | ELISA, WB         | (1, 9)     |
|                  | Rats                             | LPS <i>S. Typhosa</i> 0901                                        | protein levels ↑ (from 1h post LPS, in ventricular tissue) | WB, zymography    | (2)        |
|                  | Rats                             | LPS <i>E.Coli</i> O55:B5 / CLP / LPS and/or PepG <i>S. aureus</i> | protein levels ↑                                           | ELISA, zymography | (10, 11)   |

|               |                           |                                                                                        |                                       |                                                           |                  |
|---------------|---------------------------|----------------------------------------------------------------------------------------|---------------------------------------|-----------------------------------------------------------|------------------|
|               | Rats                      | CLP                                                                                    | gelatinolytic activity ↑              | gelatin degradation assay with serine protease inhibitors | (10)             |
|               | Pig                       | live <i>E. Coli</i> LE392                                                              | protein levels ↑                      | zymography                                                | (3)              |
|               | Baboons                   | LPS <i>E. Coli</i>                                                                     | protein levels ↑                      | zymography                                                | (12)             |
|               | Human                     | patient samples / LPS <i>E. Coli</i> / LPS <i>E. Coli</i> O113 / PepG <i>S. aureus</i> | protein levels ↑                      | ELISA, zymography                                         | WB, (1, 4-8, 13) |
| <b>TIMP-1</b> | Human                     | patient samples / 28-day follow up patients                                            | protein levels ↑                      | ELISA                                                     | (5, 6, 13)       |
| <b>TIMP-2</b> | Human                     | patient samples                                                                        | protein levels ↑                      | ELISA                                                     | (5)              |
| <b>HEART</b>  |                           |                                                                                        |                                       |                                                           |                  |
| <b>MMP-2</b>  | Human cardiac fibroblasts | LPS                                                                                    | mRNA =                                | qRT-PCR                                                   | (14)             |
|               | Mice                      | CLP                                                                                    | mRNA ↑                                | qRT-PCR                                                   | (14)             |
|               | Rats                      | LPS <i>S. Typhosa</i> 0901                                                             | protein levels ↓ (in heart perfusate) | zymography                                                | (15)             |
|               |                           |                                                                                        | protein levels ↓ (6-12h post LPS)     | WB, zymography                                            | (2)              |
| <b>MMP-9</b>  | Human cardiac fibroblasts | LPS                                                                                    | mRNA ↑, protein levels ↑              | qRT-PCR, zymography                                       | WB, (14)         |
|               | Mice                      | CLP                                                                                    | mRNA ↑                                | qRT-PCR                                                   | (14)             |

|               |                              |                                                                      |                                       |                                          |      |
|---------------|------------------------------|----------------------------------------------------------------------|---------------------------------------|------------------------------------------|------|
|               | Rats                         | LPS <i>S. Typhosa</i> 0901                                           | protein levels ↑ (in heart perfusate) | zymography                               | (15) |
| <b>BRAIN</b>  |                              |                                                                      |                                       |                                          |      |
| <b>MMP-2</b>  | Cell culture (rat microglia) | LPS <i>Vibrio vulnificus</i> MO6-24/O /<br>LPS <i>E. Coli</i> O26:B6 | protein levels =                      | zymography                               | (16) |
| <b>MMP-9</b>  | Cell culture (rat microglia) | LPS <i>Vibrio vulnificus</i> MO6-24/O /<br>LPS <i>E. Coli</i> O26:B6 | protein levels ↑                      | zymography                               | (16) |
|               | Mice                         | LPS <i>E. Coli</i> O26:B6                                            | mRNA =, protein levels ↑              | RPA, zymography                          | (17) |
| <b>TIMP-1</b> | Mice                         | LPS <i>E. Coli</i> O26:B6                                            | mRNA ↑                                | RPA <i>in situ</i> hybridization         | (17) |
| <b>LUNG</b>   |                              |                                                                      |                                       |                                          |      |
| <b>MMP-2</b>  | Rats                         | CLP / LPS and/or PepG <i>S. aureus</i>                               | protein levels ↑                      | IHC                                      | (18) |
|               | Guinea Pigs                  | LPS                                                                  | Protein levels ↑                      | zymography                               | (19) |
|               | Pigs                         | LPS <i>E. Coli</i> 111:B4                                            | protein levels ↑                      | zymography                               | (20) |
| <b>MMP-9</b>  | MMP-9 <sup>-/-</sup> mice    | CLP                                                                  | lung injury score ↓*                  | WB                                       | (1)  |
|               | Mice                         | LPS <i>E. Coli</i> 0127:B8                                           | activity of MMP-9 promotor =          | Transgenic mouse model <i>luciferase</i> | (21) |

|               |             |                                                        |                                                    |                                                                                                                           |              |
|---------------|-------------|--------------------------------------------------------|----------------------------------------------------|---------------------------------------------------------------------------------------------------------------------------|--------------|
|               |             |                                                        |                                                    | gene under <i>mmp9</i><br>promotor control                                                                                |              |
|               | Rats        | LPS <i>E. Coli</i> O55:B5 / CLP /LPS                   | protein levels ↑                                   | IHC                                                                                                                       | (11, 18)     |
|               | Guinea Pigs | LPS                                                    | Protein levels ↑                                   | zymography                                                                                                                | (19)         |
|               | Pigs        | LPS <i>E. Coli</i> / LPS <i>E. Coli</i> 111:B4         | protein levels ↑                                   | zymography                                                                                                                | (20)         |
| <b>LIVER</b>  |             |                                                        |                                                    |                                                                                                                           |              |
| <b>MMP-2</b>  | Mice        | LPS <i>E. Coli</i> 026:B6                              | protein levels =                                   | zymography                                                                                                                | (17)         |
|               | Rats        | CLP                                                    | protein levels ↑                                   | WB                                                                                                                        | (10)         |
| <b>MMP-9</b>  | Mice        | LPS <i>E. Coli</i> 0127:B8 / LPS <i>E. Coli</i> 026:B6 | MMP-9<br>activation ↑; mRNA ↑;<br>protein levels ↑ | promotor<br>RPA, zymography,<br>Transgenic mouse<br>model <i>luciferase</i><br>gene under <i>mmp9</i><br>promotor control | (17, 21)     |
|               | Rats        | LPS <i>E. Coli</i> O55:B5 / CLP / LPS                  | protein levels ↑                                   | IHC,<br>zymography                                                                                                        | WB, (10, 11) |
| <b>MMP-13</b> | Mice        | LPS <i>E. Coli</i> 026.B6                              | mRNA ↑                                             | RPA                                                                                                                       | (17)         |
| <b>MMP-14</b> | Mice        | LPS <i>E. Coli</i> 026:B6                              | mRNA ↑                                             | RPA                                                                                                                       | (17)         |
| <b>TIMP-1</b> | Mice        | LPS <i>E. Coli</i> 026:B6                              | mRNA ↑                                             | RPA                                                                                                                       | (17)         |
| <b>TIMP-3</b> | Mice        | LPS <i>E. Coli</i> 026:B6                              | mRNA ↑                                             | RPA                                                                                                                       | (17)         |
| <b>KIDNEY</b> |             |                                                        |                                                    |                                                                                                                           |              |

|               |      |                                                        |                                                       |                                                                                                                                 |          |
|---------------|------|--------------------------------------------------------|-------------------------------------------------------|---------------------------------------------------------------------------------------------------------------------------------|----------|
| <b>MMP-2</b>  | Mice | LPS <i>E. Coli</i> O26:B6                              | protein levels =                                      | zymography                                                                                                                      | (17)     |
| <b>MMP-3</b>  | Mice | LPS <i>E. Coli</i> O26:B6                              | mRNA ↑                                                | RPA                                                                                                                             | (17)     |
| <b>MMP-9</b>  | Mice | LPS <i>E. Coli</i> O127:B8 / LPS <i>E. Coli</i> O26:B6 | MMP-9 promoter activation =; mRNA ↑; protein levels ↑ | RPA, zymography                                                                                                                 | (17, 21) |
|               | Rats | LPS <i>E. Coli</i> O55:B5                              | protein levels ↑                                      | IHC                                                                                                                             | (11)     |
| <b>MMP-10</b> | Mice | LPS <i>E. Coli</i> O55:B5                              | mRNA ↑                                                | RPA                                                                                                                             | (17)     |
| <b>MMP-13</b> | Mice | LPS <i>E. Coli</i> O26:B6                              | mRNA ↑                                                | RPA, <i>in situ</i> hybridization                                                                                               | (17)     |
| <b>MMP-14</b> | Mice | LPS <i>E. Coli</i> O26:B6                              | mRNA ↑                                                | RPA                                                                                                                             | (17)     |
| <b>TIMP-1</b> | Mice | LPS <i>E. Coli</i> O26:B6                              | mRNA ↑                                                | RPA                                                                                                                             | (17)     |
| <b>SPLEEN</b> |      |                                                        |                                                       |                                                                                                                                 |          |
| <b>MMP-2</b>  | Mice | LPS <i>E. Coli</i> O26:B6                              | Protein levels =                                      | zymography                                                                                                                      | (17)     |
| <b>MMP-9</b>  | Mice | LPS <i>E. Coli</i> O127:B8 / LPS <i>E. Coli</i> O26:B6 | MMP-9 promoter activity =; mRNA ↑; Protein levels =   | RPA, <i>in situ</i> hybridization, zymography, Transgenic mouse model <i>luciferase</i> gene under <i>mmp9</i> promoter control | (17, 21) |

|               |      |                           |        |                                           |
|---------------|------|---------------------------|--------|-------------------------------------------|
| <b>MMP-13</b> | Mice | LPS E. Coli O26:B6        | mRNA ↑ | RPA, <i>in situ</i> (17)<br>hybridization |
| <b>MMP-14</b> | Mice | LPS E. Coli O26:B6        | mRNA ↑ | RPA (17)                                  |
| <b>TIMP-1</b> | Mice | LPS <i>E. Coli</i> O26:B6 | mRNA ↑ | RPA, <i>in situ</i> (17)<br>hybridization |

**CLP**; cecal ligation/perforation, **IHC**; immunohistochemistry, **LPS**; Lipopolysaccharides, **PepG**; peptidoglycan, **RPA**; RNase protection assay, **WB**; Western blot, ↑; increased, =; unchanged, ↓; decreased.

1. Rahman M, Zhang S, Chew M, Syk I, Jeppsson B, Thorlacius H. Platelet shedding of CD40L is regulated by matrix metalloproteinase-9 in abdominal sepsis. *J Thromb Haemost*. 2013 Jul;11(7):1385-98.
2. Lalu MM, Csont T, Schulz R. Matrix metalloproteinase activities are altered in the heart and plasma during endotoxemia. *Crit Care Med*. 2004 Jun;32(6):1332-7.
3. Castellheim A, Thorgersen EB, Hellerud BC, Pharo A, Johansen HT, Brosstad F, et al. New biomarkers in an acute model of live *Escherichia coli*-induced sepsis in pigs. *Scand J Immunol*. 2008 Jul;68(1):75-84.
4. Albert J, Radomski A, Soop A, Sollevi A, Frostell C, Radomski MW. Differential release of matrix metalloproteinase-9 and nitric oxide following infusion of endotoxin to human volunteers. *Acta Anaesthesiol Scand*. 2003 Apr;47(4):407-10.
5. Hoffmann U, Bertsch T, Dvortsak E, Liebetrau C, Lang S, Liebe V, et al. Matrix-metalloproteinases and their inhibitors are elevated in severe sepsis: prognostic value of TIMP-1 in severe sepsis. *Scand J Infect Dis*. 2006;38(10):867-72.
6. Lauhio A, Hastbacka J, Pettila V, Tervahartiala T, Karlsson S, Varpula T, et al. Serum MMP-8, -9 and TIMP-1 in sepsis: high serum levels of MMP-8 and TIMP-1 are associated with fatal outcome in a multicentre, prospective cohort study. Hypothetical impact of tetracyclines. *Pharmacol Res*. 2011 Dec;64(6):590-4.
7. Pugin J, Widmer MC, Kossodo S, Liang CM, Preas HLn, Suffredini AF. Human neutrophils secrete gelatinase B in vitro and in vivo in response to endotoxin and proinflammatory mediators. *Am J Respir Cell Mol Biol*. 1999 Mar;20(3):458-64.
8. Wang YY, Myhre AE, Pettersen SJ, Dahle MK, Foster SJ, Thiernemann C, et al. Peptidoglycan of *Staphylococcus aureus* induces enhanced levels of matrix metalloproteinase-9 in human blood originating from neutrophils. *Shock*. 2005 Sep;24(3):214-8.

9. Hasan Z, Palani K, Rahman M, Zhang S, Syk I, Jeppsson B, et al. Rho-kinase signaling regulates pulmonary infiltration of neutrophils in abdominal sepsis via attenuation of CXC chemokine formation and Mac-1 expression on neutrophils. *Shock*. 2012 Mar;37(3):282-8.
10. Maitra SR, Bhaduri S, Valane PD, Tervahartiala T, Sorsa T, Ramamurthy N. Inhibition of matrix metalloproteinases by chemically modified tetracyclines in sepsis. *Shock*. 2003 Sep;20(3):280-5.
11. Teng L, Yu M, Li JM, Tang H, Yu J, Mo LH, et al. Matrix metalloproteinase-9 as new biomarkers of severity in multiple organ dysfunction syndrome caused by trauma and infection. *Mol Cell Biochem*. 2012 Jan;360(1-2):271-7.
12. Paemen L, Jansen PM, Proost P, Van Damme J, Opdenakker G, Hack E, et al. Induction of gelatinase B and MCP-2 in baboons during sublethal and lethal bacteraemia. *Cytokine*. 1997 Jun;9(6):412-5.
13. Wang M, Zhang Q, Zhao X, Dong G, Li C. Diagnostic and prognostic value of neutrophil gelatinase-associated lipocalin, matrix metalloproteinase-9, and tissue inhibitor of matrix metalloproteinases-1 for sepsis in the Emergency Department: an observational study. *Crit Care*. 2014;18(6):634.
14. Tomita K, Takashina M, Mizuno N, Sakata K, Hattori K, Imura J, et al. Cardiac fibroblasts: contributory role in septic cardiac dysfunction. *J Surg Res*. 2015 Feb;193(2):874-87.
15. Lalu MM, Gao CQ, Schulz R. Matrix metalloproteinase inhibitors attenuate endotoxemia induced cardiac dysfunction: a potential role for MMP-9. *Mol Cell Biochem*. 2003 Sep;251(1-2):61-6.
16. Mayer AM, Hall ML, Holland M, De Castro C, Molinaro A, Aldulescu M, et al. *Vibrio vulnificus* MO6-24/O lipopolysaccharide stimulates superoxide anion, thromboxane B(2), matrix metalloproteinase-9, cytokine and chemokine release by rat brain microglia in vitro. *Mar Drugs*. 2014 Apr;12(4):1732-56.
17. Pagenstecher A, Stalder AK, Kincaid CL, Volk B, Campbell IL. Regulation of matrix metalloproteinases and their inhibitor genes in lipopolysaccharide-induced endotoxemia in mice. *Am J Pathol*. 2000 Jul;157(1):197-210.
18. Steinberg J, Halter J, Schiller HJ, Dasilva M, Landas S, Gatto LA, et al. Metalloproteinase inhibition reduces lung injury and improves survival after cecal ligation and puncture in rats. *J Surg Res*. 2003 May 15;111(2):185-95.
19. D'Ortho MP, Jarreau PH, Delacourt C, Macquin-Mavier I, Levame M, Pezet S, et al. Matrix metalloproteinase and elastase activities in LPS-induced acute lung injury in guinea pigs. *Am J Physiol*. 1994 Mar;266(3 Pt 1):L209-16.
20. Carney DE, McCann UG, Schiller HJ, Gatto LA, Steinberg J, Picone AL, et al. Metalloproteinase inhibition prevents acute respiratory distress syndrome. *J Surg Res*. 2001 Aug;99(2):245-52.
21. Biron-Pain K, St-Pierre Y. Monitoring mmp-9 gene expression in stromal cells using a novel transgenic mouse model. *Cell Mol Life Sci*. 2012 Mar;69(5):783-91.



## Supplementary Methods

### Protein extraction and quantification

Tissues were homogenized and proteins extracted with a precellys lysing kit (Bertin Technologies). Tissue samples were placed in hard tissue homogenizing CK28 tubes (Bertin Technologies). 1 ml of assay buffer (50 mM Tris, 150 mM NaCl, 5 mM CaCl<sub>2</sub>, 0,01% tween-20 and pH 7.4) was added to all tubes and homogenization was done using the Precellys®24 (2x 5s at 6000g, Bertin Technologies). To precipitate all tissue debris, the tubes were centrifuged at 20800 g and 4°C for 15 minutes. The supernatant, containing soluble proteins, was collected. Prior to zymography analysis, the total protein content of all samples was determined by using a standard Bradford assay (Bio-Rad).

### RNA extraction, preparation of cDNA and qPCR

RNA was extracted from tissue with the Qiagen RNeasy mini kit (Qiagen). The quantity and quality of the extracted RNA was examined with a NanoDrop ND-1000 spectrophotometer (Isogen). Next, equal amounts of RNA were converted to cDNA with a high-capacity cDNA reverse transcription kit (Applied Biosystems) and a GeneAmp PCR system 9700 (Applied Biosystems). Finally, qPCR was performed using TaqMan® fast universal PCR master mix (Applied Biosystems), PrimeTime® predesigned qPCR assays (IDT) and a 7500 Fast Real-Time PCR System (Applied Biosystems). qPCR was performed using the following PrimeTime® predesigned qPCR assays (IDT): *Mmp2* (Mm.PT.58.7728513), *Mmp9* (Mm.PT.58.45834688.g), *Tbp* (Mm.PT.58.17504874), *Timp1* (Mm.PT.58.43416496), *Timp2* (Mm.PT.58.8927491), *Timp3* (Mm.PT.58.5548479); *Timp4* (Mm.PT.58.8559650), *Mpo* (Mm.PT.58.5251395) and *Elane* (Mm.PT.58.6682392.gs).

### Gelatin zymography

Prior to gelatin zymography, the protein extracts were first spiked with a low molecular weight ( $\pm 50$  kDa) form of MMP-9 (MMP-9 $\Delta$ HemOG) as a loading control and subsequently pre-purified using a previously described gelatin affinity chromatography method (1). MMP-9 $\Delta$ HemOG lacks both the C-terminal hemopexin domain (Hem) and O-glycosylated linker (OG) and was recombinantly produced in Sf9 cells as previously described (2). Briefly, gelatin-Sepharose beads (GE Healthcare) were washed three times with equilibration buffer (50 mM Tris, 0.5 M NaCl, 10 mM CaCl<sub>2</sub>, 0.01% tween 20 and pH 7.5) and diluted 1/2 in equilibration buffer. Next, 20  $\mu$ l of this solution was added to each well of a 96-well high-throughput

chromatography plate. Samples and spiking (480 pg MMP-9  $\Delta$ HemOG, an MMP-9 deletion mutant, to calculate the recovery of the prepurified samples) were added to the columns and this suspension was incubated at room temperature for 30 minutes. After incubation the columns were rinsed three times with washing buffer 1 (50 mM Tris, 0.5 M NaCl, 10 mM CaCl<sub>2</sub>, 0.05% tween 20 and pH 7.5) and twice with washing buffer 2 (50 mM Tris, 10 mM NaCl, 0.05% Tween 20 and pH 7.5). Finally, gelatinases were eluted in 20  $\mu$ l non-reducing loading buffer and stored at -20°C. Gelatin zymography was performed as previously described (1,3). Briefly, zymography gels were prepared consisting of an 8% acrylamide separating gel with incorporation of 1 mg/ml gelatin (Sigma Aldrich G1890) and a 5% stacking gel. Next, the gels were placed in an electrophoresis system (running buffer: 25 mM Tris, 192 mM glycine and 0.1% SDS) and the samples, diluted in non-reducing loading dye, were added to the wells and electrophoretically separated. The gels were removed from the gel system and washed twice for 20 minutes in re-activation buffer containing 2.5% Triton-X-100. During this step, SDS is washed away which allows the proteins to partially refold. Next, the refolded gelatinases will degrade the gelatin in the gel during an overnight incubation ( $\pm$  16h) in 50 mM Tris-HCl, 10 mM CaCl<sub>2</sub> and pH 7.5 at 37°C. Finally, the gels were stained with 0.1% Coomassie Brilliant Blue R-350 (GE Healthcare). Zymograms were analysed densitometrically using the ImageQuant TL software (GE Healthcare).

### **Two-dimensional zymography**

Bone marrow and lung lysates (containing 8 ng of proMMP-9 monomer, based on semi-quantitative zymography) were incubated with gelatin-Sepharose (GE Healthcare Life Sciences) for 30 minutes, and by shaking at room temperature. The gelatin-bound fraction was washed with the use of 50 mM Tris pH 7.4, 0.05% Tween-20 and eluted in 8 M ureum and 2% N-cyclohexyl-3-aminopropanesulfonic acid (CAPS). Immobilized 3-10 non-linear pH gradient strips (ThermoFisher) were incubated with the obtained gelatin-Sepharose-purified fraction, after the addition of broad range ampholytes (Bio Rad) for 1 hour at room temperature to rehydrate in a ZOOM IPGRunner Cassette (ThermoFisher). Afterwards, isoelectric focusing was performed in the ZOOM IPGRunner system (ThermoFisher) for 20 min at 200 V, 15 min at 450 V, 15 min at 750 V and 75 min at 2000 V. The strips were loaded onto 10 % SDS-PAGE gels co-polymerised with 1 mg/ml gelatin. Gelatin zymography was performed as described previously (1,3).

### **Gelatin degradation assay**

Bone marrow extracts were treated with 10  $\mu$ M elastase inhibitor (Elastase Inhibitor IV, Calbiochem) to inhibit gelatinolytic activity derived from elastase or with 10  $\mu$ M SB-3CT (sc-205847, Santa Cruz Biotechnology) to inhibit MMP-2 and MMP-9 gelatinolytic activity. Subsequently these mixtures were incubated with 2.5  $\mu$ g/ml fluorogenic gelatin (DQ™ Gelatin from pig skin, ThermoFisher Scientific) and fluorescence was measured at (ex. 485 nm/em. 530 nm) as previously described (4).

### **Immunohistochemistry**

First the slides were deparaffinised in the Leica autostainer XL (Leica Biosystems). Next, the slides were subjected to heat retrieval for 10 min at 97°C and pH 6 in the PT Link (DAKO), followed by 10 min incubation with peroxidase-blocking reagent (DAKO) and were washed twice for 5 minutes in wash buffer (DAKO). Next the primary antibody, goat anti-mouse MMP-9 (R&D Systems), was diluted 100 times in antibody diluent (DAKO) to have a final concentration of 1  $\mu$ g/ml and 200  $\mu$ l was added to each slide and incubated for 30 minutes. After incubation, the slides were washed twice for 5 minutes in wash buffer (DAKO). Thereafter the secondary antibody, polyclonal rabbit anti-goat (DAKO), was diluted 20 times in antibody diluent and 10% N-hydroxysulfosuccinimide was added. 200  $\mu$ l of the secondary antibody was added to the slides, incubated for 30 minutes, followed by a double wash step for 5 min with wash buffer. Finally, 3,3' diaminobenzidine was added to the slides and incubated for 6 minutes. Counterstaining and mounting of the slides was performed in the Leica autostainer XL and Leica CV5030 respectively. Finally, the tissue was imaged using a Leica Dmlb microscope.

### **Flow cytometry**

Red blood cells of the spleen, bone marrow and blood cell suspensions were lysed by two incubations (5 and 3 min at 37°C) with 0.83% NH<sub>4</sub>Cl solution. Remaining cells were washed twice with ice-cold PBS containing 2% FCS. Next, 0.5x10<sup>6</sup> cells were incubated for 15 min with Fc-receptor-blocking antibodies anti-CD16/anti-CD32 (BD Biosciences Pharmingen, San Diego, CA, USA) and Zombie aqua BV510 (death cells staining) (BioLegend, San Diego, CA, USA). After washing with PBS supplemented with 2% FCS, cells were stained for 30 min with the indicated conjugated antibodies. FITC-conjugated anti-Gr1, PE-conjugated anti-F4/80, APC-conjugated anti-CD11b, PE-Cy7-conjugated anti-CD3 and PerCp Cy5.5-conjugated anti-CD19 were purchased from eBioscience (San Diego, CA, USA). Cells were washed twice and fixed with

0.37% formaldehyde in PBS and analysed with a FACS Fortessa flow cytometer. Data were processed with the FlowJo software (Becton Dickinson Labware, Franklin Lakes, NJ, USA).

#### **References to 'supplementary Methods'**

1. Descamps FJ, Martens E, Opdenakker G. Analysis of gelatinases in complex biological fluids and tissue extracts. *Lab Invest.* 2002 Nov;82(11):1607-8.
2. Van den Steen PE, Van Aelst I, Hvidberg V, Piccard H, Fiten P, Jacobsen C, et al. The hemopexin and O-glycosylated domains tune gelatinase B/MMP-9 bioavailability via inhibition and binding to cargo receptors. *J Biol Chem.* 2006 Jul 7;281(27):18626-37.
3. Vandooren J, Geurts N, Martens E, Van den Steen PE, Opdenakker G. Zymography methods for visualizing hydrolytic enzymes. *Nat Methods.* 2013 Mar;10(3):211-20.
4. Vandooren J, Geurts N, Martens E, Van den Steen PE, Jonghe SD, Herdewijn P, et al. Gelatin degradation assay reveals MMP-9 inhibitors and function of O-glycosylated domain. *World J Biol Chem.* 2011 Jan 26;2(1):14-24.

**Supplementary Figure 1:** Representative zymograms of bone marrow, spleen, lungs, liver and plasma of control mice.

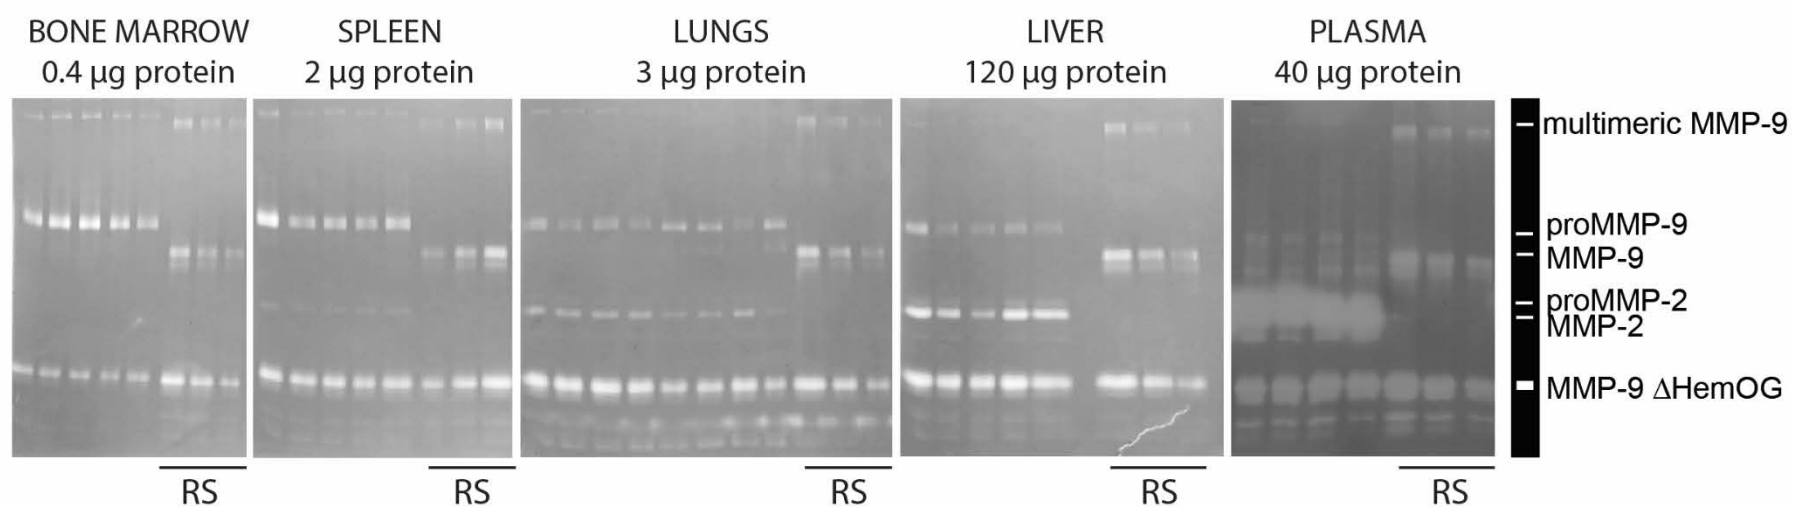

Representative gelatin zymography gels of bone marrow, spleen, lung, liver and plasma of control mice. Each lane represents the analysis of the sample from a single mouse. Each sample was spiked with an internal processing and loading control (MMP-9 $\Delta$ HemOG) and each gel has three lanes of recombinant MMP-9 standard protein (RS), including multimeric, monomeric and MMP-9  $\Delta$ HemOG proteins, to serve as a molecular weight marker and standard (10, 5 and 3  $\mu$ g). The loading quantity of the samples corresponded with, respectively, 0.4  $\mu$ g (bone marrow), 2  $\mu$ g (spleen), 3  $\mu$ g (lung), 120  $\mu$ g (liver) and 40  $\mu$ g (plasma) of total protein.

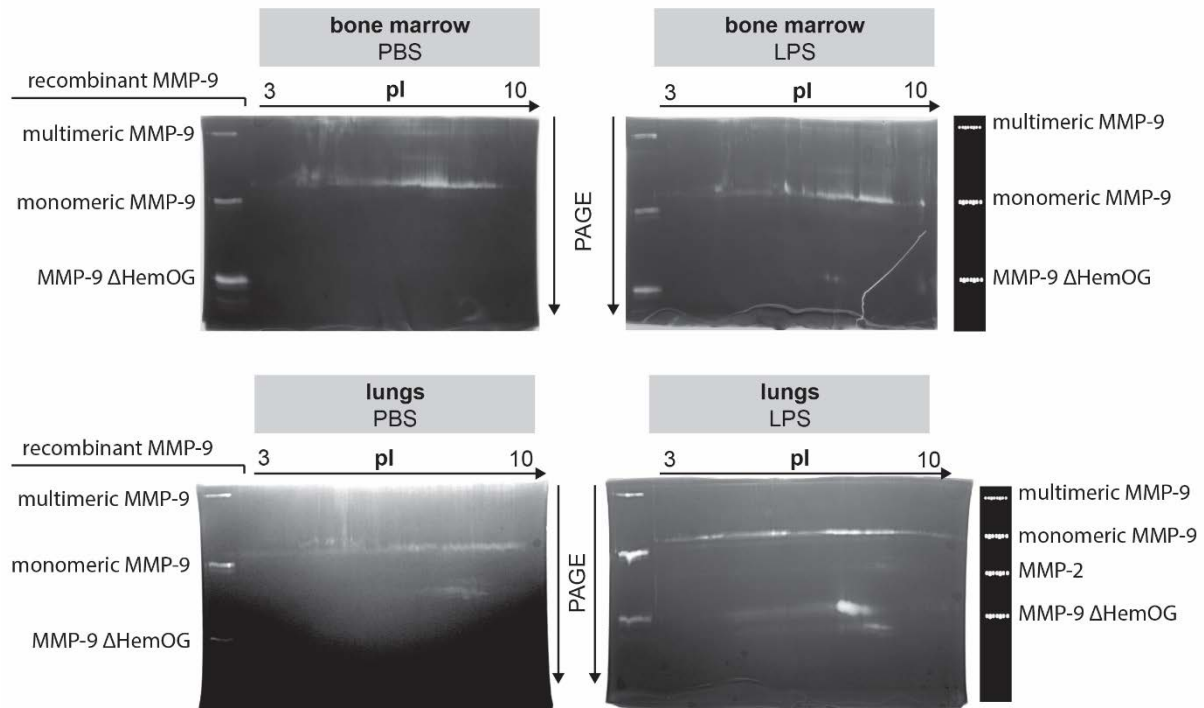

**Supplementary Figure 2:** Bidimensional zymography analysis of bone marrow and lung samples of mice *i.p.* injected with LPS or control mice (PBS injection). Samples were first separated based on charge by isoelectrofocussing under a pI (isoelectric point) gradient of 3 to 10. Next, samples were separated according to size by standard gelatin zymography techniques. The lung LPS sample was spiked with an internal control (MMP-9ΔHemOG = MMP-9 form lacking the C-terminal hemopexin and O-glycosylated domains) and each gel has one left lane of recombinant MMP-9 standard protein, including multimeric, monomeric and MMP-9 ΔHemOG proteins, to serve as molecular weight markers. Because the tissular levels of MMPs change after LPS stimulation and because different tissues contain different amounts of MMPs, we titrated MMP-9 in preliminary experiments, as to allow equivalent visualization of all isoforms of the enzyme. For this reason, different quantities had to be loaded for each 2D-gelatin zymography gel. The loading quantities of the samples corresponded with, 10 μg and 140 μg (bone marrow) and 288 μg and 130 μg (lung) of total protein for PBS and LPS treatments, respectively.
