# Supplementary material for: Endotoxemia shifts neutrophils with TIMP-free gelatinase B/MMP-9 from bone marrow to the periphery and induces systematic upregulation of TIMP-1
Source: PubMed Central journal article supplement — Haematologica. 2017 Aug 3;102(10):1671–82. doi: 10.3324/haematol.2017.168799 (PMC5622851; doi:10.3324/haematol.2017.168799), 2017-10
Supplement: 2017_168799-Disclosures_and_Contributions.pdf [file 2017_168799-Disclosures_and_Contributions.pdf]

Haematologica  
HAEMATOL/2017/168799  
Version 3

Endotoxemia shifts neutrophils with TIMP-free gelatinase B/ MMP-9  
from bone marrow to periphery and induces systematic upregulation of  
TIMP-1

Jennifer Vandooren, Wannes Swinnen, Estefania Ugarte-Berzal, Lise  
Boon, Daphne Dorst, Erik Martens, and Ghislain Opdenakker

Disclosures: This research was funded by the Research Foundation of Flanders  
(FWO-Vlaanderen) and KU Leuven (C16/17/010). JV is supported by the Rega Foundation,  
Leuven.

Contributions: JV, WS, EUB, LB, DD and EM performed research, JV performed data  
analysis, JV and GO wrote the manuscript, GO supervised the study.
